# Supplementary material
Source: PubMed Central journal article supplement (PMC8044050)
Supplement: NIHMS1687819-supplement-supinfo.pdf [file NIHMS1687819-supplement-supinfo.pdf]

## SUPPLEMENTAL METHODS

### *Phenotype and covariate data in survivor cohorts*

In the Childhood Cancer Survivor Study (CCSS), information related to the original pediatric cancer diagnosis and treatment was abstracted from medical records. CCSS has abstracted dose data for selected chemotherapies: doses of IV, IT methotrexate were available in CCSS and used in the current analyses. For other chemotherapies (corticosteroids), we considered exposure (yes/no) only. Using data from review of individual radiation therapy (RT) records, the maximum tumor dose (maxTD) from RT was estimated as the total delivered dose from all overlapping RT fields across seven major treatment regions, i.e., head, neck, chest, abdomen, pelvis, arm, and leg.<sup>(1)</sup> For each of these major treatment regions, radiation dose to adjacent regions to the primary treatment site were estimated to have received 2 Gy, while radiation dose to more distal body regions from the primary treatment site was estimated at 0.2 Gy. All other phenotype data were either self-reported in CCSS questionnaires or reported by family proxies for survivors who could not complete surveys, were deceased, or <18 years old. Fracture histories were only queried in the 2007 and 2014 follow-up questionnaires. Because the 2007 follow-up questionnaire only requested the age at first fracture, we extracted fracture histories for all discovery cohort participants from the 2014 follow-up questionnaire which queried lifetime fracture history and corresponding ages of occurrence and skeletal sites of fractures, allowing study of fractures occurring after primary cancer diagnosis. All reported fractures were assigned ICD9/10 medical diagnostic codes by a trained nosologist and reviewed for relevance. Participants with incomplete fracture event histories that precluded characterization of post-diagnosis incident fracture events were excluded (Supplemental Figure 1). Premature menopause status, defined as cessation of menses before age 40 years, was ascertained using CCSS baseline and follow-up questionnaires,<sup>(2)</sup> while attained height and weight were taken from the 2014 CCSS follow-up questionnaire.

St. Jude Lifetime Cohort Study (SJLIFE) participants with biobanked specimens and at least one St. Jude Children's Research Hospital (SJCRH) on-site clinical assessment visit as of June 30, 2017 were included in the SJLIFE replication analysis. Data related to primary cancer diagnosis and treatments were obtained from medical record review at SJCRH, similar to CCSS. Measured height and weight were taken from the most recent SJCRH study visit and premature menopause status was clinically assessed and graded according to the NCI Common Terminology Criteria for Adverse Event (CTCAE) v4.03 classification system.

### *Genotype data in CCSS and SJLIFE*

For CCSS, DNA was genotyped at the Cancer Genomics Research Laboratory of the National Cancer Institute (Bethesda, MD) using the Illumina HumanOmni5Exome array. Genotypes were called with Genotyping Module v1.9 (Illumina GenomeStudio software v2011.1). Samples with excess missingness ( $\geq 8\%$ ), heterozygosity ( $< 0.11$  or  $> 0.16$ ), sex discordance (X chromosome heterozygosity  $> 5\%$  for males or  $< 20\%$  for females), and cryptic relatedness (identity-by-descent sharing  $> 0.70$ ) were removed. For the 5,739 samples meeting these quality control thresholds, genotypes were imputed using Minimac3<sup>(3)</sup> and the Haplotype Reference Consortium r1.1 reference panel. A total of 2,453 participants of European genetic ancestry (see *Ancestry* below) who also met study inclusion criteria were retained (Supplemental Figure 1). Analyses excluded rare/low-frequency SNPs (minor allele frequency  $< 5\%$ ), as well as SNPs with excess missingness ( $> 5\%$ ) and departures from Hardy-Weinberg equilibrium ( $P < 1 \times 10^{-6}$  among participants without fracture events). Analyses were further restricted to SNPs with high imputation quality ( $r^2 \geq 0.8$ ), leaving  $\sim 5.4$  million SNPs.

In SJLIFE, sequencing for 3,006 samples was completed at the HudsonAlpha Institute for Biotechnology Genomic Services Laboratory (Huntsville, AL) using the Illumina HiSeq X10 platform to yield 150 base pair paired-end reads with an average coverage per sample of 36.8X. Variant calls were processed with GATK v3.4.0<sup>(4)</sup> and BCFtools<sup>(5)</sup>. PLINK v1.90b<sup>(6)</sup> and VCFtools v0.1.13<sup>(7)</sup> were used to perform additional quality control, applying the following sample exclusion criteria: excess missingness ( $\geq 5\%$ ), cryptic relatedness ( $\pi\text{-hat} > 0.25$ ), and excess heterozygosity ( $> 3$  SD). Variants with Hardy Weinberg equilibrium test  $P < 1 \times 10^{-10}$  and  $> 10\%$  missingness across samples were removed. Analyses were restricted to 1,417 SJLIFE participants of European ancestry (see *Ancestry* below) who met replication study inclusion criteria.

### *Ancestry*

Procedures to identify the genetic ancestry of SJLIFE and CCSS samples have been described elsewhere.<sup>(8,9)</sup> Briefly, an EIGENSTRAT-based principal component analysis<sup>(10)</sup> was performed with PLINK v1.90b

for each cohort by combining cohort samples with samples from 1000 Genomes (1000G) global reference populations. Samples with principal component scores  $\pm 3$  SD of the means of the first two principal components in the 1000G European population were considered to be of European ancestry.

### *Relevant cancer treatment covariates*

Before conducting SNP association testing with fracture risk, we evaluated univariate associations between fracture risk following childhood cancer diagnosis and cancer treatments with known osteotoxic effects in the CCSS discovery cohort. Time to first post-diagnosis fracture was analyzed using Cox proportional hazards regression models with age as the time scale, with follow-up time split into 1-year intervals in a counting-process data format beginning from childhood cancer diagnosis to first fracture or censoring at completion of the 2014 follow-up questionnaire. Univariate treatment associations (as hazard ratios or HRs) adjusted for sex, attained height and weight, and premature menopause status with  $P < 0.2$  (from two-sided testing) were considered to be relevant adjustment covariates. Treatment associations meeting this criterion included any exposure to corticosteroids, intravenous (IV) and intrathecal (IT) methotrexate dose, and maxTD from RT to any of seven body regions (head, neck, chest, abdomen, pelvis, arm, leg).

### *Annotation of credible sets of SNPs*

The Bayesian approach used to construct 99% credible intervals or sets of SNPs assumes the causal variant was genotyped and a single causal variant is responsible for the signal at that locus. Each locus was defined as the 1 Mb window centered at the most strongly associated SNP in discovery. With association summary statistics from the discovery analysis, we calculated an approximate Bayes' Factor<sup>(11)</sup>:

$$BF_j = \sqrt{1 - R_j} \exp\left(\frac{R_j \beta_j^2}{2\sigma_j^2}\right)$$

where  $\beta_j$  and  $\sigma_j$  are the allelic effect estimate ( $\log[\text{HR}]$ ) and standard error of the  $j^{\text{th}}$  SNP, and  $R_j = 0.04/(\sigma_j^2 + 0.04)$ , which incorporates a Gaussian prior  $N(0, 0.2^2)$  that gives higher probability to smaller effect sizes. The posterior probability that the  $j^{\text{th}}$  SNP is causal was calculated by  $\pi_j = BF_j / \sum_{k=1}^K BF_k$ . We then constructed 99% credible sets of SNPs for each locus by ranking all SNPs by their approximate Bayes' Factors and then included ranked SNPs until their cumulative posterior probability exceeded 0.99.

We examined credible set SNP associations in recent published GWAS of related phenotypes (estimated bone mineral density<sup>(12)</sup>; fracture<sup>(13)</sup>) and phenome-wide association study (PheWAS) results from the UK Biobank PheWeb (<http://pheweb.sph.umich.edu:5000>) for 2,419 UK Biobank phenotypes and the Michigan Genomics Initiative PheWeb (<http://pheweb.sph.umich.edu/>) for 1,448 ICD9 medical diagnostic codes. Coding and regulatory consequences of credible set SNPs, including Combined Annotation Dependent Depletion<sup>(14)</sup> (CADD) scores predicting variant deleteriousness (PHRED-scaled such that scores  $> 10$  represent variants with the top 10% of CADD scores, etc.), were annotated using the Ensembl Variant Effect Predictor<sup>(15)</sup> (VEP v99, genome build GRCh37). Credible set SNPs significantly associated with gene expression, i.e., expression quantitative trait loci (eQTLs;  $\text{FDR} \leq 5\%$ ), and DNA methylation levels, i.e., methylation quantitative trait loci (meQTLs;  $\text{FDR} < 5\%$ ), were identified from the Genotype-Tissue Expression<sup>(16)</sup> (GTEx v8) project, NHLBI Genome-Wide Repository of Associations between SNPs and Phenotypes (GRASP v2.0.0.0)<sup>(17)</sup>, and BIOS Consortium<sup>(18)</sup> (BIOS QTL) databases. Chromatin state annotations for regulatory states (e.g., promoters, enhancers) based on the 25-state ChromHMM model trained on 12 epigenetic marks for 127 epigenomes<sup>(19)</sup> were obtained from the Roadmap Epigenomics Consortium.

Chromatin state annotations from 25-state ChromHMM<sup>(19)</sup> were used to study enrichments for credible set SNP posterior probability in putative promoter states in a set of cell types specified *a priori* for relevance to fracture risk in survivors and were compared to a set of nine common human cell types from the Encyclopedia of DNA Elements<sup>(20)</sup> (ENCODE) Project reflecting a diversity of cell lines and tissue sources (GM12878 [B-lymphocyte], K562 [chronic myelogenous leukemia], HepG2 [hepatocellular carcinoma], HSMM [skeletal muscle myoblast], HUVEC [umbilical vein endothelial], NHEK [epidermal keratinocyte], NHLF [lung fibroblast], H1-hESC [embryonic stem cell], HMEC [mammary epithelial]). Promoter annotations based on ChromHMM were used because these annotations are based on prediction models learned on multiple directly measured experimental and imputed histone modification marks across multiple cell types rather than defining a promoter region based on one or two specific measured histone modification marks. We used pooled chromatin state annotations for active promoter (states 1-4 for active transcription start sites and upstream/downstream promoter flanks), poised promoter

(states 22-23 for poised/bivalent promoters), and any promoter (active or poised) states. We then applied a permutation-based enrichment test procedure<sup>(21)</sup> to evaluate whether SNPs with higher probability of being “causal” (credible-set SNPs) are more likely to overlap promoter annotations in certain cell types (e.g., phenotype-relevant cells types vs. unrelated cell types) than expected. For each cell type, we first computed the mean posterior probability for the set of credible set SNPs overlapping promoter annotations and then generated a null distribution by calculating the mean poster probability of credible set SNPs overlapping randomly permuted promoter annotations (i.e., shifting promoter annotations’ genomic locations by a random distance selected from a uniform distribution of 1 to 100,000 bases in either direction of the observed promoter site) for 100,000 permutations. Relative fold enrichments were estimated by the ratio of the observed to expected posterior probability and test p-values were calculated by the proportion of permutations with an expected posterior probability that was equal or greater than the observed. A Bonferroni-corrected p-value threshold ( $P < 0.05/\text{number of cell types}$ ) was used to identify significant enrichments for credible set SNPs overlaps with cell-specific promoter annotations.

**SUPPLEMENTAL FIGURES**

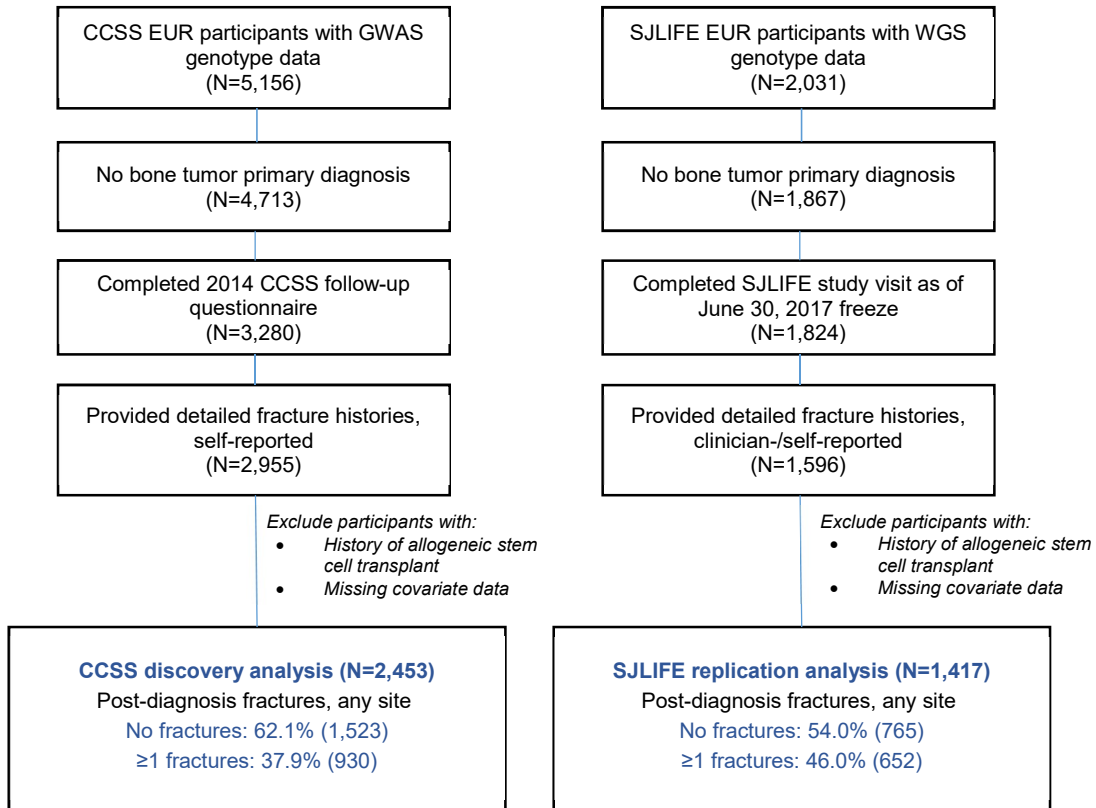

Supplemental Figure 1: Overview of major inclusion/exclusion criteria for final analytic samples.

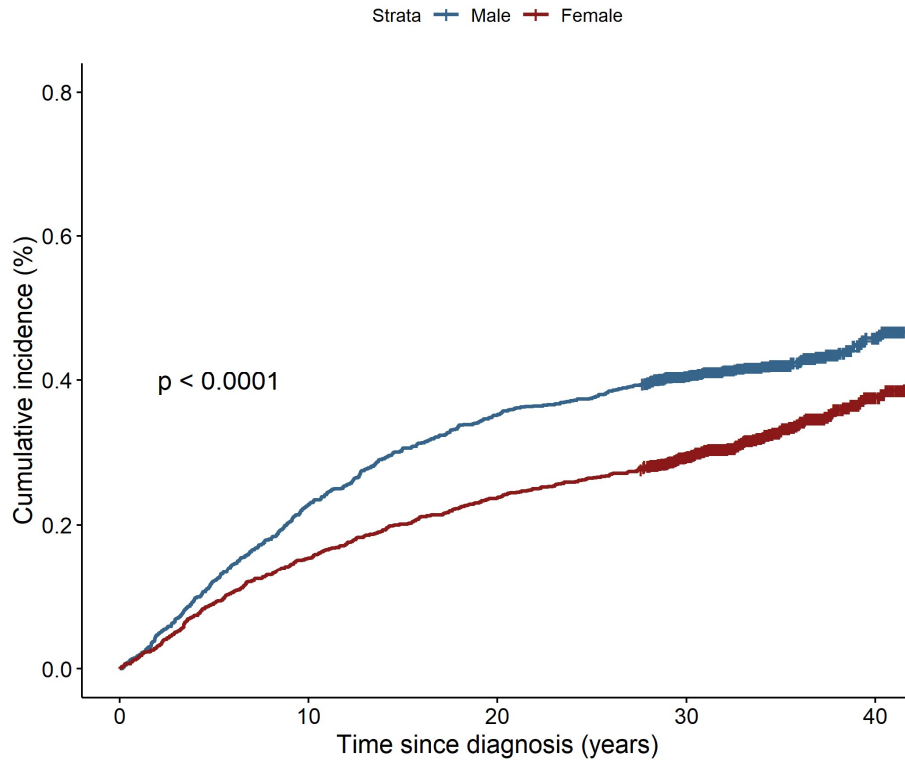

Supplemental Figure 2: Cumulative incidence curves for post-diagnosis fracture by sex in the CCSS discovery cohort (1,289 female survivors; 1,164 male survivors). The p-value from the log-rank test comparing the fracture risk probability distributions between sexes is provided in the lower left corner.

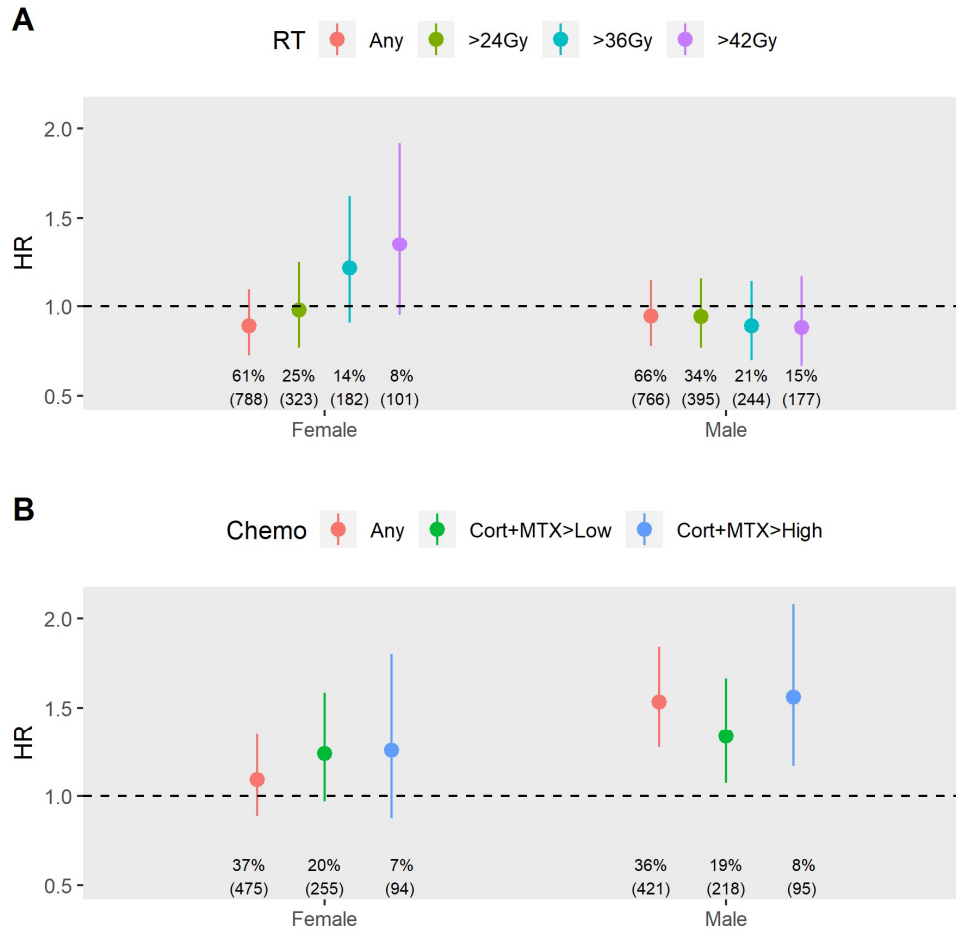

Supplemental Figure 3: Treatment threshold effects on risk of fracture following childhood cancer diagnosis by sex in the CCSS discovery cohort. Each panel shows HR estimates (dots) and respective 95% CIs (whiskers) grouped by sex, with colors corresponding to treatment threshold definitions. The top panel (A) compares adjusted fracture risk associations with threshold indicator variables for maximum cumulative radiation dosimetry dose across 7 body regions, with thresholds increasing from left to right (none versus any dose [orange],  $\leq 24$  Gy versus  $>24$  Gy [blue],  $\leq 36$  Gy versus  $>36$  Gy [teal],  $\leq 42$  Gy versus  $>42$  Gy [purple]). The bottom panel (B) compares adjusted fracture risk associations with threshold indicator variables for composite chemotherapy defined by corticosteroid exposure and IV/IT methotrexate dose, with IV/IT methotrexate dose thresholds increasing from left to right (none versus any dose [orange]; no corticosteroid exposure and  $\leq$  median IV/IT methotrexate versus corticosteroid exposure and  $>$  median IV/IT methotrexate dose [green], no corticosteroid exposure and  $\leq 3^{\text{rd}}$  quartile IV/IT methotrexate versus corticosteroid exposure and  $>3^{\text{rd}}$  quartile IV/IT methotrexate dose [green]). Proportions and frequencies of participants meeting threshold definitions are provided at the bottom of each panel.

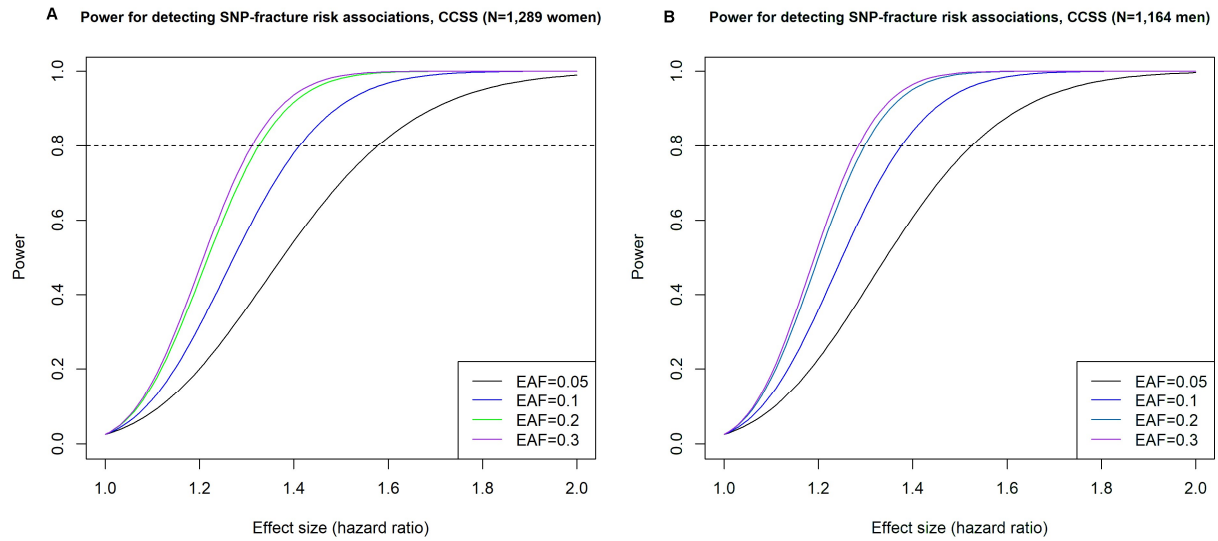

Supplemental Figure 4: Power estimates to detect SNP-fracture risk associations in the CCSS discovery cohort. Panels A and B show power estimates in female and male CCSS survivors, respectively. All power calculations use a time-to-event approach, observed cumulative incidences and sample sizes, and a type I error probability of 0.05. The dashed line represents 80% power, intersecting a range of hazard ratios and effect allele carrier probabilities consistent with specific effect allele frequencies (EAFs).

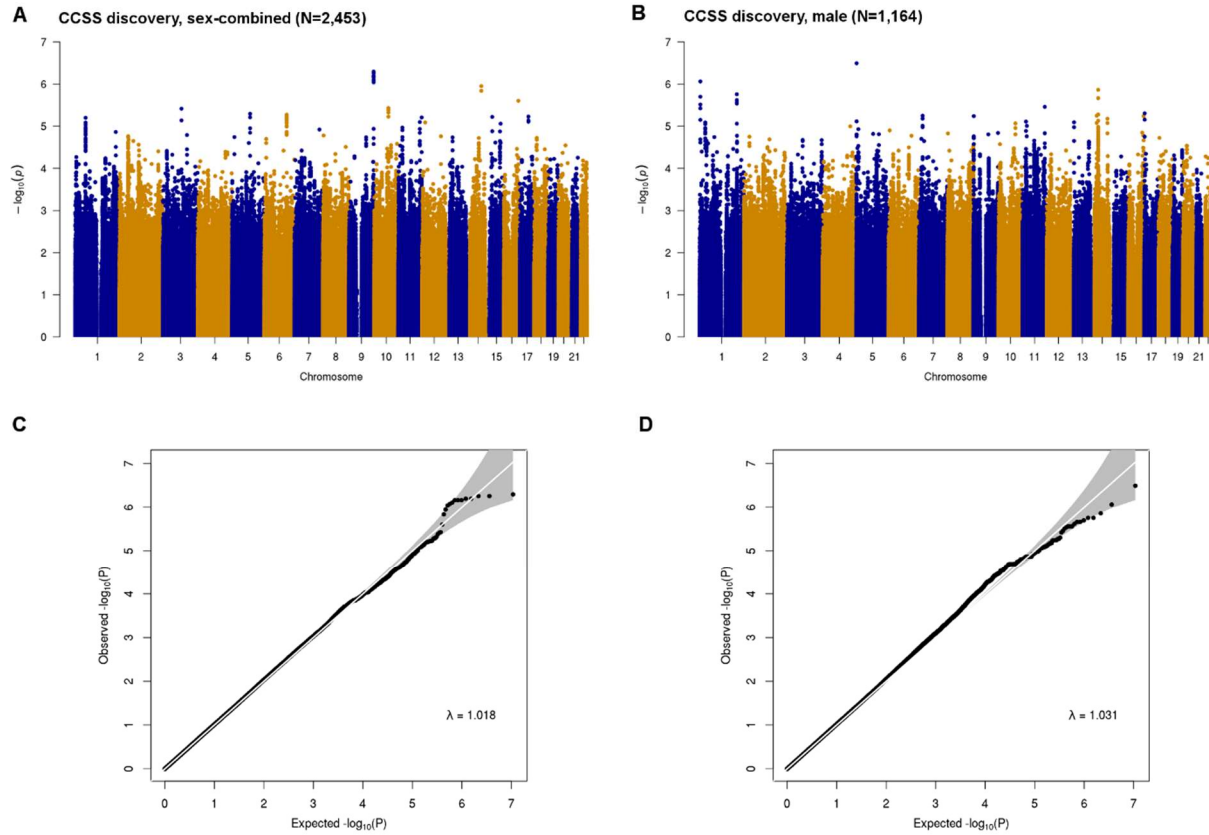

Supplemental Figure 5: Manhattan and quantile-quantile (QQ) plots for SNP association test p-values from post-diagnosis fracture risk GWAS in sex-combined and male survivors in CCSS. Manhattan plots illustrate  $-\log_{10}$  p-values for SNP associations with post-diagnosis fracture risk (y-axis) against SNP genomic positions (x-axis), while QQ plots show observed  $-\log_{10}$  p-values (y-axis) against those expected under the null distribution of no association (x-axis). Panels A and C show Manhattan and QQ plots, respectively, for the sex-combined discovery analysis, while panels B and D are Manhattan and QQ plots, respectively, for the male discovery analysis.



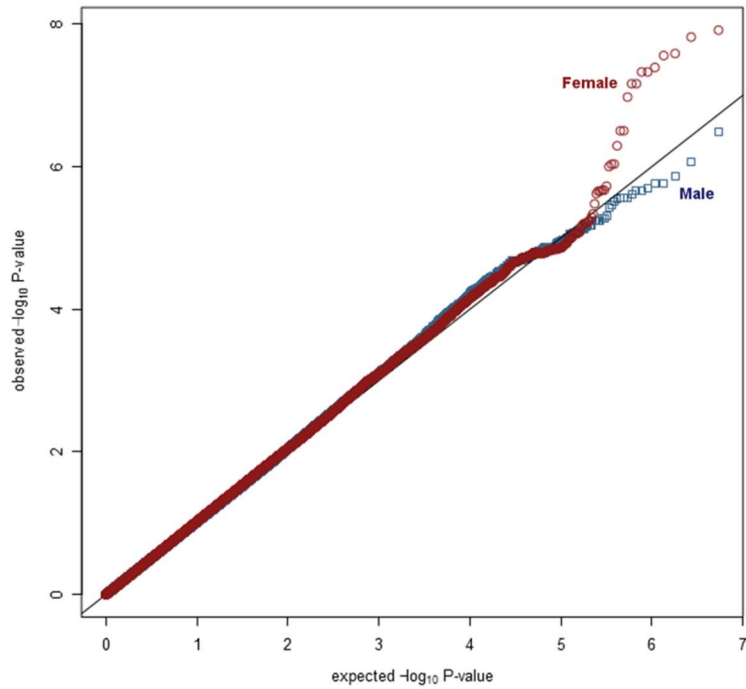

Supplemental Figure 6: QQ plots for SNP association test p-values from post-diagnosis fracture risk GWAS in sex-specific CCSS samples. The QQ plots of results from genome-wide association analyses performed in female survivors (red) and male survivors (blue) show observed  $-\log_{10}$  p-values (y-axis) against those expected under the null distribution of no association (x-axis).

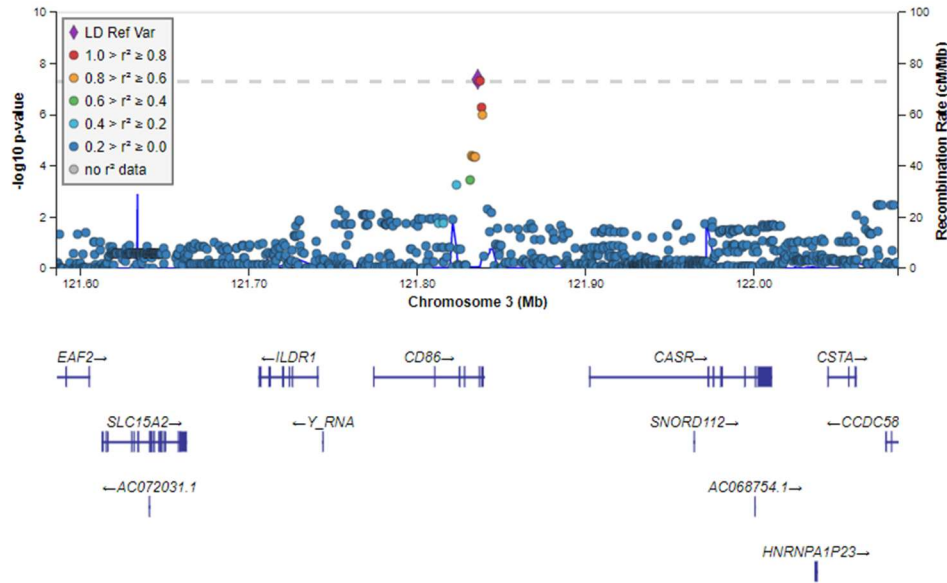

Supplemental Figure 7: LocusZoom plot of female-specific association p-values ( $-\log_{10}P$ ) for the *CD86* locus. Results within a 500-kb window of the SNP with the strongest association with post-diagnosis fracture risk in this window (rs4315642, represented by the purple diamond) are shown. SNP color coding corresponds to the magnitude of LD with the top SNP (in  $r^2$ , 1000G EUR).

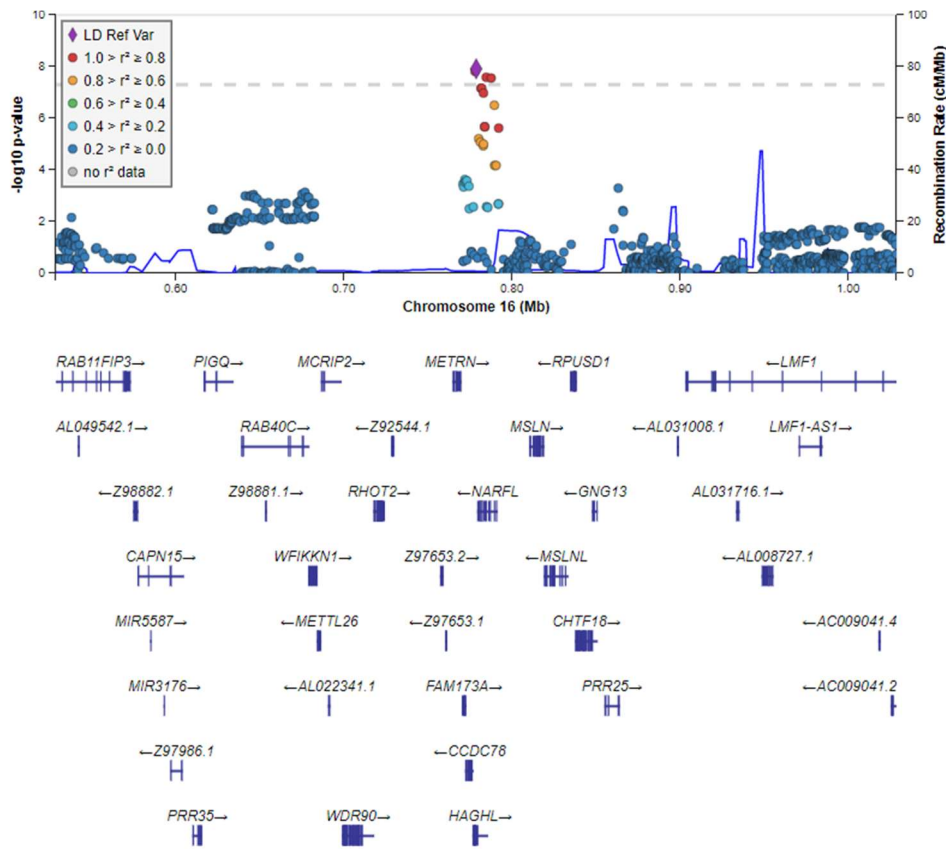

Supplemental Figure 8: LocusZoom plot of female-specific association p-values ( $-\log_{10}P$ ) for the *HAGHL* locus. Results within a 500-kb window of the SNP with the strongest association with post-diagnosis fracture risk in this window (rs12448432, represented by the purple diamond) are shown. SNP color coding corresponds to the magnitude of LD with the top SNP (in  $r^2$ , 1000G EUR).

## SUPPLEMENTAL TABLES

Supplemental Table 1: Distribution of skeletal sites of first fracture events assessed in CCSS and SJLIFE

| Fracture sites          | CCSS Discovery (N=2,453) |                 |               | SJLIFE Replication (N=1,417) |                 |               |
|-------------------------|--------------------------|-----------------|---------------|------------------------------|-----------------|---------------|
|                         | Sex-Combined<br>% (n)    | Female<br>% (n) | Male<br>% (n) | Sex-Combined<br>% (n)        | Female<br>% (n) | Male<br>% (n) |
| Wrist, forearm          | 23.4% (218)              | 21.4% (92)      | 25.1% (126)   | 20.9% (136)                  | 22.8% (56)      | 19.7% (80)    |
| Rib                     | 3.2% (30)                | 4.0% (17)       | 2.6% (13)     | 4.4% (29)                    | 5.3% (13)       | 3.9% (16)     |
| Shin                    | 2.7% (25)                | 2.1% (9)        | 3.2% (16)     | 3.5% (23)                    | 4.1% (10)       | 3.2% (13)     |
| Hip/pelvis              | 1.4% (13)                | 2.3% (10)       | 0.6% (3)      | 1.4% (9)                     | 1.2% (3)        | 1.5% (6)      |
| Kneecap                 | 1.1% (10)                | 1.4% (6)        | 0.8% (4)      | 0.9% (6)                     | 0.8% (2)        | 1.0% (4)      |
| Spine                   | 0.9% (8)                 | 0.9% (4)        | 0.8% (4)      | 6.7% (44)                    | 6.9% (17)       | 6.7% (27)     |
| Shoulder                | 0.6% (6)                 | 0.2% (1)        | 1.0% (5)      | 0.8% (5)                     | 0.4% (1)        | 1.0% (4)      |
| Skull, face             | 3.5% (33)                | 2.6% (11)       | 4.4% (22)     | 4.3% (28)                    | 2.4% (6)        | 5.4% (22)     |
| Fingers, toes           | 20.3% (189)              | 22.1% (95)      | 18.8% (94)    | 12.4% (81)                   | 13.0% (32)      | 12.1% (49)    |
| Lower limb <sup>a</sup> | 25.7% (239)              | 29.1% (125)     | 22.8% (114)   | 24.8% (162)                  | 28.5% (70)      | 22.7% (92)    |
| Upper limb <sup>b</sup> | 37.3% (347)              | 33.8% (145)     | 40.3% (202)   | 35.7% (233)                  | 35.0% (86)      | 36.2% (147)   |
| Other                   | 7.0% (65)                | 4.9% (21)       | 8.8% (44)     | 5.8% (38)                    | 5.3% (13)       | 6.2% (25)     |
| Total                   | 930                      | 429             | 501           | 652                          | 246             | 406           |

a. Includes fractures of the upper leg, kneecap, lower leg, shin, foot, ankle.

b. Includes fractures of the upper arm, wrist, forearm, hand.

Supplemental Table 2: Multivariable models of adjusted cancer treatment associations in CCSS discovery samples

| Covariate                                          | HR (95% CI)      | Z     | P                    |
|----------------------------------------------------|------------------|-------|----------------------|
| <b>Sex-combined model<sup>a</sup> (N=2,453)</b>    |                  |       |                      |
| Corticosteroids (any vs. none)                     | 1.13 (0.96-1.32) | 1.49  | 0.14                 |
| IV methotrexate dose (100 g/m <sup>2</sup> )       | 1.20 (1.00-1.45) | 1.97  | 0.05                 |
| IT methotrexate dose (100 mg/m <sup>2</sup> )      | 1.07 (0.99-1.15) | 1.73  | 0.08                 |
| Radiation dosimetry dose (10 Gy)                   | 0.99 (0.95-1.03) | -0.55 | 0.58                 |
| <b>Female-specific model<sup>b</sup> (N=1,289)</b> |                  |       |                      |
| Corticosteroids (any vs. none)                     | 1.08 (0.86-1.38) | 0.67  | 0.50                 |
| IV methotrexate dose (100 g/m <sup>2</sup> )       | 1.02 (0.76-1.37) | 0.13  | 0.90                 |
| IT methotrexate dose (100 mg/m <sup>2</sup> )      | 0.99 (0.88-1.12) | -0.14 | 0.89                 |
| Radiation dosimetry dose (10 Gy)                   | 0.98 (0.92-1.05) | -0.56 | 0.58                 |
| <b>Male-specific model<sup>c</sup> (N=1,164)</b>   |                  |       |                      |
| Corticosteroids (any vs. none)                     | 1.15 (0.93-1.42) | 1.32  | 0.19                 |
| IV methotrexate dose (100 g/m <sup>2</sup> )       | 1.46 (1.15-1.85) | 3.12  | 1.8x10 <sup>-3</sup> |
| IT methotrexate dose (100 mg/m <sup>2</sup> )      | 1.11 (1.02-1.22) | 2.31  | 0.02                 |
| Radiation dosimetry dose (10 Gy)                   | 0.99 (0.94-1.04) | -0.41 | 0.68                 |

- a. Adjusted for sex, height, weight, and premature menopause status.  
b. Adjusted for height, weight, and premature menopause status.  
c. Adjusted for height, weight.

Supplemental Table 3: Functional and regulatory annotations of 99% credible set SNPs at genome-wide significant loci

| SNP        | CHR | BP     | EA | Genes (5 kb)         | Functional consequences <sup>a</sup>                                                                     | Predicted amino acid changes <sup>a</sup>   | CADD <sup>b</sup> | Regulatory consequences <sup>a</sup> | Strongest eQTL <sup>c</sup>                | GTEX8 top 3 eGenes <sup>d</sup> | Thyroid eGenes <sup>e</sup> (top 3) | Strongest meQTL <sup>d</sup>                               | Active promoter <sup>f</sup> | Poised promoter <sup>f</sup> | Active enhancer <sup>f</sup> | Weak enhancer <sup>f</sup> | State <sup>g</sup> : Osteoblast   Chondrocytes | State <sup>g</sup> : Fetal brain | State <sup>g</sup> : Ovary | Other relevant QTL <sup>f</sup>                                          | Published GWS associations <sup>g</sup> |
|------------|-----|--------|----|----------------------|----------------------------------------------------------------------------------------------------------|---------------------------------------------|-------------------|--------------------------------------|--------------------------------------------|---------------------------------|-------------------------------------|------------------------------------------------------------|------------------------------|------------------------------|------------------------------|----------------------------|------------------------------------------------|----------------------------------|----------------------------|--------------------------------------------------------------------------|-----------------------------------------|
| rs1406815  | 16  | 778158 | G  | CCDC78; HAGHL; NARFL | HAGHL (non coding transcript exon variant; synonymous variant; missense variant)                         | p.Arg50Gly                                  | 2.575             | promoter (HAGHL, CCDC78)             | NARFL (Tissue=Thyroid, EAdir=+, P=2.0e-43) | NARFL; HAGHL; WFIKKN1           | NARFL; HAGHL; WFIKKN1               | NA                                                         | 69                           | 48                           | 0                            | 10                         | 1_TssA   22_PromP                              | 1_TssA                           | 1_TssA                     | NA                                                                       | NA                                      |
| rs12448432 | 16  | 778820 | A  | CCDC78; HAGHL; NARFL | HAGHL (non coding transcript exon variant; synonymous variant; missense variant; NMD transcript variant) | p.[Ala202Thr; Ala94Thr; Ala84Thr; Ala21Thr] | 2.036             | promoter (HAGHL, CCDC78)             | NARFL (Tissue=Thyroid, EAdir=+, P=1.1e-57) | NARFL; HAGHL; WFIKKN1           | NARFL; HAGHL; WDR90                 | NA                                                         | 25                           | 45                           | 11                           | 39                         | 22_PromP   22_PromP                            | 23_PromBiv                       | 23_PromBiv                 | HAGHL eQTL [probe ILMN_15715], treated osteoblasts (dexamethasone, PGE2) | NA                                      |
| rs3829492  | 16  | 781633 | A  | HAGHL; NARFL         | NA (HAGHL, non-coding/intronic variant)                                                                  | NA                                          | 16.11             | NA                                   | NARFL (Tissue=Thyroid, EAdir=+, P=1.3e-62) | NARFL; HAGHL; C16orf13          | NARFL; HAGHL; WDR90                 | MSLN; NARFL; HAGHL (EAdir=+, Probe=cg27144592, P=3.3e-310) | 0                            | 0                            | 0                            | 0                          | 8_TxWk   8_TxWk                                | 7_Tx3'                           | 7_Tx3'                     | NA                                                                       | NA                                      |
| rs12443759 | 16  | 782132 | T  | HAGHL; NARFL         | NA (HAGHL, non-coding/intronic variant)                                                                  | NA                                          | 4.136             | NA                                   | NARFL (Tissue=Thyroid, EAdir=+, P=3.6e-63) | NARFL; HAGHL; C16orf13          | NARFL; HAGHL; WDR90                 | MSLN; NARFL; HAGHL (EAdir=+, Probe=cg27144592, P=3.3e-310) | 0                            | 0                            | 0                            | 0                          | 8_TxWk   8_TxWk                                | 7_Tx3'                           | 7_Tx3'                     | NA                                                                       | NA                                      |
| rs61112891 | 16  | 783156 | C  | HAGHL; NARFL         | HAGHL (non coding transcript exon variant); NARFL (non coding transcript exon variant)                   | NA                                          | 1.736             | TF binding site (NARFL)              | NARFL (Tissue=Thyroid, EAdir=+, P=2.2e-62) | NARFL; HAGHL; C16orf13          | NARFL; HAGHL; WDR90                 | MSLN; NARFL; HAGHL (EAdir=+, Probe=cg27144592, P=3.3e-310) | 0                            | 0                            | 0                            | 0                          | 7_Tx3'   7_Tx3'                                | 7_Tx3'                           | 7_Tx3'                     | NA                                                                       | NA                                      |
| rs12051048 | 16  | 783864 | A  | HAGHL; NARFL         | HAGHL (non coding transcript exon variant)                                                               | NA                                          | 3.14              | NA                                   | NARFL (Tissue=Thyroid, EAdir=+, P=7.2e-79) | NARFL; WFIKKN1; HAGHL           | NARFL; HAGHL; WFIKKN1               | NA                                                         | 0                            | 0                            | 0                            | 0                          | 7_Tx3'   7_Tx3'                                | 7_Tx3'                           | 7_Tx3'                     | NA                                                                       | NA                                      |
| rs12051245 | 16  | 783865 | C  | HAGHL; NARFL         | HAGHL (non coding transcript exon variant)                                                               | NA                                          | 2.563             | NA                                   | NARFL (Tissue=Thyroid, EAdir=+, P=7.2e-79) | NARFL; WFIKKN1; HAGHL           | NARFL; HAGHL; WFIKKN1               | NA                                                         | 0                            | 0                            | 0                            | 0                          | 7_Tx3'   7_Tx3'                                | 7_Tx3'                           | 7_Tx3'                     | NA                                                                       | NA                                      |
| rs9928077  | 16  | 784765 | T  | HAGHL; NARFL         | HAGHL (non coding transcript exon variant)                                                               | NA                                          | 11.63             | NA                                   | NARFL (Tissue=Thyroid, EAdir=+, P=9.0e-58) | NARFL; HAGHL; WFIKKN1           | NARFL; HAGHL; WDR90                 | MSLN; NARFL; HAGHL (EAdir=+, Probe=cg27144592, P=3.3e-310) | 0                            | 0                            | 0                            | 0                          | 7_Tx3'   7_Tx3'                                | 7_Tx3'                           | 7_Tx3'                     | NA                                                                       | NA                                      |
| rs12597563 | 16  | 787738 | C  | NARFL                | NARFL (5 prime UTR variant; missense variant; NMD transcript variant)                                    | p.Pro46Ala                                  | 4.118             | NA                                   | NARFL (Tissue=Thyroid, EAdir=+, P=1.4e-47) | NARFL; HAGHL; WFIKKN1           | NARFL; HAGHL; WFIKKN1               | MSLN; NARFL; HAGHL (EAdir=+, Probe=cg27144592, P=3.3e-310) | 0                            | 0                            | 2                            | 0                          | 7_Tx3'   7_Tx3'                                | 7_Tx3'                           | 7_Tx3'                     | NA                                                                       | NA                                      |
| rs10794640 | 16  | 789618 | A  | NARFL                | NA                                                                                                       | NA                                          | 0.045             | promoter (NARFL)                     | NARFL (Tissue=Thyroid, EAdir=+, P=7.9e-48) | NARFL; HAGHL; C16orf13          | NARFL; HAGHL; C16orf13              | MSLN; NARFL; HAGHL (EAdir=+, Probe=cg27144592, P=3.3e-310) | 27                           | 9                            | 0                            | 14                         | 12_TxEnhW   12_TxEnhW                          | 10_TxEnh5'                       | 17_EnhW2                   | NA                                                                       | NA                                      |
| rs11648796 | 16  | 792190 | G  | NARFL                | NA                                                                                                       | NA                                          | 2.211             | promoter (NARFL)                     | NARFL (Tissue=Thyroid, EAdir=+, P=7.7e-55) | NARFL; WFIKKN1; HAGHL           | NARFL; HAGHL; WFIKKN1               | MSLN; NARFL; HAGHL (EAdir=+, Probe=cg27144592, P=3.3e-310) | 0                            | 2                            | 0                            | 0                          | 25_Quies   25_Quies                            | 25_Quies                         | 25_Quies                   | NA                                                                       | Height (EAdir=+, P=1.0E-13)             |

Major abbreviations: EA, effect allele; NEA, non-effect allele; EAdir, EA association direction; QTL, quantitative trait loci; eQTL, expression QTL; meQTL methylation QTL; GWS, genome-wide significant; #, number.

- Functional and overall regulatory consequences were annotated with Ensembl Variant Effect Predictor (VEP v99).
- Combined Annotation Dependent Depletion (CADD) scores reflect variant deleteriousness, PHRED-scaled such that scores >10 represent variants with the top 10% of CADD scores, >20 with top 1% of CADD scores, etc.
- eQTL variant annotations with FDR≤5% were based on GTEX v8, where eGenes are genes with at least one significant (FDR≤5%) cis-SNP association.
- BIOS QTL was used to annotate significant (FDR<5%) meQTL variants.
- Chromatin state annotations were taken from the 25-state (ChromHMM) model based on 12 epigenetic marks for 127 epigenomes (Roadmap Epigenomics Consortium). ChromHMM annotations include: 1\_TssA (active TSS), 22\_PromP (poised promoter), 23\_PromBiv (bivalent promoter), 7\_Tx3' (transcribed 3' preferential), 8\_TxWk (weak transcription); 12\_TxEnhW (transcribed and weak enhancer), 10\_TxEnh5' (transcribed 5' preferential and enhancer); 12\_TxEnhW (transcribed and weak enhancer), 17\_EnhW1 (weak enhancer), 25\_Quies (quiescent).
- Other QTL annotations were taken from the NHLBI Genome-Wide Repository of Associations between SNPs and Phenotypes (GRASP v2.0.0.0).
- NHGRI-EBI GWAS Catalog was used to annotate variants with published GWS phenotype associations.

Supplemental Table 4: Cancer treatment-stratified associations between replicated *HAGHL* SNP and post-diagnosis fracture risk in female survivors from CCSS and SJLIFE

| Head/neck RT | SNP        | Chr       | BP     | Strata | CCSS  |                    |                  |                       | SJLIFE                |                    |                  |                  |      |
|--------------|------------|-----------|--------|--------|-------|--------------------|------------------|-----------------------|-----------------------|--------------------|------------------|------------------|------|
|              |            |           |        |        | N     | N <sub>cases</sub> | HR (95% CI)      | P                     | N                     | N <sub>cases</sub> | HR (95% CI)      | P                |      |
| Head/neck RT | rs1406815  | 16        | 778158 | None   | 501   | 175                | 1.22 (0.95-1.57) | 0.11                  | 331                   | 115                | 1.38 (1.03-1.85) | 0.03             |      |
|              | rs1406815  | 16        | 778158 | Any    | 788   | 254                | 1.88 (1.54-2.28) | 2.4x10 <sup>-10</sup> | 315                   | 131                | 1.14 (0.83-1.57) | 0.43             |      |
|              | rs1406815  | 16        | 778158 | >24Gy  | 195   | 57                 | 3.05 (1.95-4.76) | 9.1x10 <sup>-7</sup>  | 145                   | 54                 | 1.48 (0.85-2.57) | 0.17             |      |
|              | rs1406815  | 16        | 778158 | >36Gy  | 117   | 39                 | 3.79 (1.95-7.34) | 8.2x10 <sup>-5</sup>  | 61                    | 22                 | 3.08 (1.09-8.74) | 0.03             |      |
|              | rs12448432 | 16        | 778820 | None   | 501   | 175                | 1.25 (0.97-1.61) | 0.09                  | 331                   | 115                | 1.38 (1.03-1.85) | 0.03             |      |
|              | rs12448432 | 16        | 778820 | Any    | 788   | 254                | 1.86 (1.53-2.26) | 4.2x10 <sup>-10</sup> | 315                   | 131                | 1.12 (0.81-1.54) | 0.50             |      |
|              | rs12448432 | 16        | 778820 | >24Gy  | 195   | 57                 | 2.90 (1.87-4.52) | 2.3x10 <sup>-6</sup>  | 145                   | 54                 | 1.48 (0.85-2.57) | 0.17             |      |
|              | rs12448432 | 16        | 778820 | >36Gy  | 117   | 39                 | 3.51 (1.83-6.75) | 1.6x10 <sup>-4</sup>  | 61                    | 22                 | 3.08 (1.09-8.74) | 0.03             |      |
|              | rs9928077  | 16        | 784765 | None   | 501   | 175                | 1.22 (0.95-1.57) | 0.13                  | 331                   | 115                | 1.38 (1.03-1.85) | 0.03             |      |
|              | rs9928077  | 16        | 784765 | Any    | 788   | 254                | 1.86 (1.53-2.26) | 4.2x10 <sup>-10</sup> | 315                   | 131                | 1.13 (0.82-1.56) | 0.46             |      |
|              | rs9928077  | 16        | 784765 | >24Gy  | 195   | 57                 | 2.90 (1.87-4.52) | 2.3x10 <sup>-6</sup>  | 145                   | 54                 | 1.48 (0.85-2.57) | 0.17             |      |
|              | rs9928077  | 16        | 784765 | >36Gy  | 117   | 39                 | 3.51 (1.83-6.75) | 1.6x10 <sup>-4</sup>  | 61                    | 22                 | 3.08 (1.09-8.74) | 0.03             |      |
|              | Trunk RT   | rs1406815 | 16     | 778158 | None  | 501                | 175              | 1.22 (0.95-1.57)      | 0.11                  | 334                | 115              | 1.36 (1.01-1.84) | 0.04 |
|              |            | rs1406815 | 16     | 778158 | Any   | 788                | 254              | 1.88 (1.55-2.28)      | 2.2x10 <sup>-10</sup> | 312                | 131              | 1.20 (0.88-1.64) | 0.25 |
|              |            | rs1406815 | 16     | 778158 | >24Gy | 278                | 89               | 2.07 (1.49-2.86)      | 1.2x10 <sup>-5</sup>  | 117                | 53               | 0.97 (0.56-1.70) | 0.92 |
|              |            | rs1406815 | 16     | 778158 | >36Gy | 144                | 51               | 2.47 (1.57-3.90)      | 9.3x10 <sup>-5</sup>  | 40                 | 22               | 0.31 (0.08-1.14) | 0.08 |
| rs12448432   |            | 16        | 778820 | None   | 501   | 175                | 1.25 (0.97-1.61) | 0.09                  | 334                   | 115                | 1.36 (1.01-1.84) | 0.04             |      |
| rs12448432   |            | 16        | 778820 | Any    | 788   | 254                | 1.86 (1.53-2.27) | 3.9x10 <sup>-10</sup> | 312                   | 131                | 1.18 (0.86-1.62) | 0.30             |      |
| rs12448432   |            | 16        | 778820 | >24Gy  | 278   | 89                 | 2.02 (1.46-2.79) | 2.3x10 <sup>-5</sup>  | 117                   | 53                 | 0.96 (0.55-1.68) | 0.88             |      |
| rs12448432   |            | 16        | 778820 | >36Gy  | 144   | 51                 | 2.40 (1.53-3.78) | 1.5x10 <sup>-4</sup>  | 40                    | 22                 | 0.34 (0.09-1.24) | 0.10             |      |
| rs9928077    |            | 16        | 784765 | None   | 501   | 175                | 1.22 (0.95-1.57) | 0.13                  | 334                   | 115                | 1.36 (1.01-1.83) | 0.04             |      |
| rs9928077    |            | 16        | 784765 | Any    | 788   | 254                | 1.86 (1.53-2.27) | 3.9x10 <sup>-10</sup> | 312                   | 131                | 1.20 (0.87-1.64) | 0.27             |      |
| rs9928077    |            | 16        | 784765 | >24Gy  | 278   | 89                 | 2.02 (1.46-2.79) | 2.3x10 <sup>-5</sup>  | 117                   | 53                 | 0.96 (0.55-1.68) | 0.88             |      |
| rs9928077    |            | 16        | 784765 | >36Gy  | 144   | 51                 | 2.40 (1.53-3.78) | 1.5x10 <sup>-4</sup>  | 40                    | 22                 | 0.34 (0.09-1.24) | 0.10             |      |
| Chemotherapy |            | rs1406815 | 16     | 778158 | None  | 644                | 212              | 1.63 (1.31-2.03)      | 1.1x10 <sup>-5</sup>  | 315                | 117              | 1.31 (0.96-1.77) | 0.09 |
|              |            | rs1406815 | 16     | 778158 | Any   | 475                | 164              | 1.33 (1.03-1.70)      | 0.03                  | 255                | 101              | 1.25 (0.90-1.74) | 0.19 |
|              |            | rs1406815 | 16     | 778158 | >Med  | 323                | 106              | 1.10 (0.79-1.53)      | 0.56                  | 170                | 69               | 1.10 (0.74-1.65) | 0.63 |
|              |            | rs1406815 | 16     | 778158 | >High | 192                | 68               | 1.08 (0.71-1.64)      | 0.71                  | 88                 | 35               | 0.94 (0.48-1.83) | 0.86 |
|              | rs12448432 | 16        | 778820 | None   | 644   | 212                | 1.63 (1.31-2.03) | 1.2x10 <sup>-5</sup>  | 315                   | 117                | 1.28 (0.94-1.74) | 0.11             |      |
|              | rs12448432 | 16        | 778820 | Any    | 475   | 164                | 1.34 (1.05-1.73) | 0.02                  | 255                   | 101                | 1.25 (0.89-1.74) | 0.19             |      |
|              | rs12448432 | 16        | 778820 | >Med   | 323   | 106                | 1.10 (0.79-1.53) | 0.56                  | 170                   | 69                 | 1.09 (0.73-1.64) | 0.68             |      |
|              | rs12448432 | 16        | 778820 | >High  | 192   | 68                 | 1.08 (0.71-1.64) | 0.71                  | 88                    | 35                 | 0.94 (0.48-1.83) | 0.86             |      |
|              | rs9928077  | 16        | 784765 | None   | 644   | 212                | 1.63 (1.31-2.03) | 1.2x10 <sup>-5</sup>  | 315                   | 117                | 1.28 (0.94-1.74) | 0.11             |      |
|              | rs9928077  | 16        | 784765 | Any    | 475   | 164                | 1.31 (1.02-1.68) | 0.04                  | 255                   | 101                | 1.24 (0.89-1.74) | 0.21             |      |
|              | rs9928077  | 16        | 784765 | >Med   | 323   | 106                | 1.08 (0.78-1.50) | 0.66                  | 170                   | 69                 | 1.12 (0.75-1.69) | 0.58             |      |
|              | rs9928077  | 16        | 784765 | >High  | 192   | 68                 | 1.03 (0.68-1.56) | 0.89                  | 88                    | 35                 | 0.89 (0.45-1.74) | 0.73             |      |

Abbreviations: RT, radiation therapy; Chr, chromosome; BP, genomic base pair position, GRCh37/hg19 reference; HR, hazard ratio; CI, confidence interval; Gy, Gray; Med, medium. Strata thresholds for each treatment were defined as no exposure ("None"), any exposure ("Any"), >median dose exposure, >3<sup>rd</sup> quartile dose exposure. Head/neck RT includes RT to the head or neck; trunk RT includes RT to chest, abdomen, or pelvis; chemotherapy combines any exposure to corticosteroids and IT/IV methotrexate dose. All reported HRs (95% CI) are adjusted for the same covariates as the main analysis, with the addition or exclusion of specific treatment covariates as appropriate to the stratification (e.g., for head/neck RT stratification, models were not adjusted for any site RT dose, but were adjusted height, weight, premature menopause status, genetic ancestry, corticosteroids exposure, IT and IV methotrexate dose, and trunk RT dose).

Supplemental Table 5: Phenome-wide association study (PheWAS) results for credible-set SNPs

| SNP        | Chr | BP     | CCSS HR | CCSS P               | 99% credible set posterior probability | GWAS phenotypes with P<threshold (P<2.1x10 <sup>-5</sup> , 2,419 phenotypes), listed in order by p-value, UK Biobank PheWeb <sup>a</sup> (N~337K) | ICD-9 category with top SNP association, MGI PheWeb <sup>b</sup> (1,448 codes, N up to ~24K) | ICD-9 codes with P<threshold, MGI PheWeb <sup>b</sup> (P<3.5x10 <sup>-5</sup> ) | MGI PheWeb <sup>b</sup> musculoskeletal ICD-9 codes with P<5x10 <sup>-3</sup> |
|------------|-----|--------|---------|----------------------|----------------------------------------|---------------------------------------------------------------------------------------------------------------------------------------------------|----------------------------------------------------------------------------------------------|---------------------------------------------------------------------------------|-------------------------------------------------------------------------------|
| rs1406815  | 16  | 778158 | 1.55    | 1.5x10 <sup>-8</sup> | 0.240                                  | Height <sup>c</sup> , mass <sup>d</sup> , weight, hip circumference, forced vital capacity                                                        | Musculoskeletal                                                                              | None                                                                            | Arthropathy, unspecified back disorders                                       |
| rs12448432 | 16  | 778820 | 1.55    | 1.2x10 <sup>-8</sup> | 0.288                                  | Height <sup>c</sup> , mass <sup>d</sup> , weight, hip circumference, forced vital capacity                                                        | Musculoskeletal                                                                              | None                                                                            | Arthropathy, unspecified back disorders                                       |
| rs3829492  | 16  | 781633 | 1.54    | 6.9x10 <sup>-8</sup> | 0.060                                  | Height <sup>c</sup> , mass <sup>d</sup> , weight, hip circumference, forced vital capacity                                                        | Musculoskeletal                                                                              | None                                                                            | Arthropathy, senile osteoporosis                                              |
| rs12443759 | 16  | 782132 | 1.54    | 6.9x10 <sup>-8</sup> | 0.060                                  | Height <sup>c</sup> , mass <sup>d</sup> , weight, hip circumference, forced vital capacity                                                        | Musculoskeletal                                                                              | None                                                                            | Arthropathy, senile osteoporosis                                              |
| rs61112891 | 16  | 783156 | 1.54    | 1.1x10 <sup>-7</sup> | 0.042                                  | Height <sup>c</sup> , mass <sup>d</sup> , weight, hip circumference, forced vital capacity                                                        | Circulatory system                                                                           | None                                                                            | Arthropathy, senile osteoporosis, ganglion cyst                               |
| rs12051048 | 16  | 783864 | 1.44    | 2.1x10 <sup>-6</sup> | 0.004                                  | Height <sup>c</sup> , mass <sup>d</sup> , weight, hip circumference, forced vital capacity                                                        | Musculoskeletal                                                                              | None                                                                            | Unspecified back disorders, arthropathy                                       |
| rs12051245 | 16  | 783865 | 1.44    | 2.1x10 <sup>-6</sup> | 0.004                                  | Height <sup>c</sup> , mass <sup>d</sup> , weight, hip circumference, forced vital capacity                                                        | Musculoskeletal                                                                              | None                                                                            | Unspecified back disorders, arthropathy                                       |
| rs9928077  | 16  | 784765 | 1.54    | 2.6x10 <sup>-8</sup> | 0.151                                  | Height <sup>c</sup> , mass <sup>d</sup> , weight, hip circumference, forced vital capacity                                                        | Musculoskeletal                                                                              | None                                                                            | Arthropathy, unspecified back disorders                                       |
| rs12597563 | 16  | 787738 | 1.57    | 2.8x10 <sup>-8</sup> | 0.126                                  | Height <sup>c</sup> , mass <sup>d</sup> , weight, hip circumference, forced vital capacity                                                        | Musculoskeletal                                                                              | None                                                                            | Arthropathy                                                                   |
| rs10794640 | 16  | 789618 | 1.54    | 3.1x10 <sup>-7</sup> | 0.015                                  | Height <sup>c</sup> , mass <sup>d</sup> , weight, hip circumference, forced vital capacity                                                        | Musculoskeletal                                                                              | None                                                                            | Ganglion cyst                                                                 |
| rs11648796 | 16  | 792190 | 1.44    | 2.4x10 <sup>-6</sup> | 0.003                                  | Height <sup>c</sup> , mass <sup>d</sup> , weight, hip circumference, forced vital capacity                                                        | Musculoskeletal                                                                              | None                                                                            | Unspecified back disorders, arthropathy                                       |

Abbreviations: Chr, chromosome; BP, base pair position (GRCh37); HR, hazard ratio; MGI, Michigan Genomics Initiative.

- UK Biobank PheWeb refers to the PheWAS browser for UK Biobank GWAS conducted by the Neale lab (<http://pheweb.sph.umich.edu:5000/>).
- MGI PheWeb refers to the PheWAS browser for ICD-9 billing codes derived from electronic health records conducted by the Michigan Genomics Initiative (<http://pheweb.sph.umich.edu/>).
- Height corresponds to multiple height phenotypes, including standing height, sitting height, and comparative height at age 10 years.
- Mass corresponds to multiple measured and predicted body mass phenotypes, including whole body, arm, and leg mass measures.



Supplemental Table 6: Evaluating the possibility of biased *HAGHL* locus SNP-fracture risk associations in female CCSS survivors due to inclusion of heritable covariates (N=1,289)

| SNP        | Chr | BP     | Model <sup>a</sup>             | Beta                   | SE(Beta)              | HR (if applicable) | P                    |
|------------|-----|--------|--------------------------------|------------------------|-----------------------|--------------------|----------------------|
| rs12448432 | 16  | 778820 | Original                       | 0.44                   | 0.08                  | 1.55               | 1.2x10 <sup>-8</sup> |
| rs12448432 | 16  | 778820 | No height adjustment           | 0.44                   | 0.08                  | 1.55               | 1.2x10 <sup>-8</sup> |
| rs12448432 | 16  | 778820 | No weight adjustment           | 0.45                   | 0.08                  | 1.57               | 5.9x10 <sup>-9</sup> |
| rs12448432 | 16  | 778820 | No height or weight adjustment | 0.45                   | 0.08                  | 1.57               | 5.7x10 <sup>-9</sup> |
| rs12448432 | 16  | 778820 | Height~SNP association         | -1.67x10 <sup>-3</sup> | 3.69x10 <sup>-3</sup> | NA                 | 0.65                 |
| rs12448432 | 16  | 778820 | Weight~SNP association         | 1.43                   | 0.93                  | NA                 | 0.13                 |
| rs1406815  | 16  | 778158 | Original                       | 0.44                   | 0.08                  | 1.55               | 1.5x10 <sup>-8</sup> |
| rs1406815  | 16  | 778158 | No height adjustment           | 0.44                   | 0.08                  | 1.55               | 1.5x10 <sup>-8</sup> |
| rs1406815  | 16  | 778158 | No weight adjustment           | 0.45                   | 0.08                  | 1.56               | 7.2x10 <sup>-9</sup> |
| rs1406815  | 16  | 778158 | No height or weight adjustment | 0.45                   | 0.08                  | 1.56               | 6.9x10 <sup>-9</sup> |
| rs1406815  | 16  | 778158 | Height~SNP association         | -1.48x10 <sup>-3</sup> | 3.68x10 <sup>-3</sup> | NA                 | 0.69                 |
| rs1406815  | 16  | 778158 | Weight~SNP association         | 1.55                   | 0.93                  | NA                 | 0.10                 |
| rs9928077  | 16  | 784765 | Original                       | 0.43                   | 0.08                  | 1.54               | 2.6x10 <sup>-8</sup> |
| rs9928077  | 16  | 784765 | No height adjustment           | 0.43                   | 0.08                  | 1.54               | 2.6x10 <sup>-8</sup> |
| rs9928077  | 16  | 784765 | No weight adjustment           | 0.44                   | 0.08                  | 1.55               | 1.4x10 <sup>-8</sup> |
| rs9928077  | 16  | 784765 | No height or weight adjustment | 0.44                   | 0.08                  | 1.55               | 1.3x10 <sup>-8</sup> |
| rs9928077  | 16  | 784765 | Height~SNP association         | -1.51x10 <sup>-3</sup> | 3.69x10 <sup>-3</sup> | NA                 | 0.68                 |
| rs9928077  | 16  | 784765 | Weight~SNP association         | 1.30                   | 0.93                  | NA                 | 0.16                 |
| rs12597563 | 16  | 787738 | Original                       | 0.45                   | 0.08                  | 1.57               | 2.8x10 <sup>-8</sup> |
| rs12597563 | 16  | 787738 | No height adjustment           | 0.45                   | 0.08                  | 1.57               | 2.9x10 <sup>-8</sup> |
| rs12597563 | 16  | 787738 | No weight adjustment           | 0.46                   | 0.08                  | 1.58               | 1.9x10 <sup>-8</sup> |
| rs12597563 | 16  | 787738 | No height or weight adjustment | 0.45                   | 0.08                  | 1.58               | 2.1x10 <sup>-8</sup> |
| rs12597563 | 16  | 787738 | Height~SNP association         | -3.08x10 <sup>-3</sup> | 3.85x10 <sup>-3</sup> | NA                 | 0.42                 |
| rs12597563 | 16  | 787738 | Weight~SNP association         | 1.04                   | 0.97                  | NA                 | 0.29                 |

a. Describes the statistical model used to generate the SNP association test statistics (Beta, SE, P). “Original” reflects the model used in the primary analysis. “No height(weight) adjustment” reflect models with the same adjustment covariates as the Original, with the exception of height (weight) covariates. “Height~SNP association” reflects a linear regression model testing adjusted associations between non-transformed height (in meters) and the SNP of interest, adjusting for all of the same covariates used in the Original model, omitting height and weight. “Weight~SNP association” reflects a linear regression model testing adjusted associations between non-transformed weight (in kilograms) and the SNP of interest, adjusting for all of the same covariates used in the Original model, omitting height and weight.

Abbreviations: SNP, single nucleotide polymorphism; Chr, chromosome; BP, base position, GRCh37 (hg19) build; Beta, regression coefficient; SE, standard error; HR, hazard ratio.

Supplemental Table 7: Credible-set SNP associations with bone mineral density, fracture risk, and femoral neck bone size in general population GWAS (UK Biobank)

| SNP        | Chr | BP     | EA | CCSS post-diagnosis fracture GWAS (N=1,289 female survivors) |                      |                       | SNP associations with estimated bone mineral density (eBMD), N=142,487 (PMID 30598549) |        |      | SNP associations with fracture risk, N=426,795 (PMID 28869591) |        |      | SNP associations with bone size (femoral neck area), N=29,059 (PMID 31053729) |       |                      |
|------------|-----|--------|----|--------------------------------------------------------------|----------------------|-----------------------|----------------------------------------------------------------------------------------|--------|------|----------------------------------------------------------------|--------|------|-------------------------------------------------------------------------------|-------|----------------------|
|            |     |        |    | HR                                                           | P                    | Posterior probability | EAF                                                                                    | Beta   | P    | EAF                                                            | ln(OR) | P    | EAF                                                                           | Beta  | P                    |
| rs1406815  | 16  | 778158 | G  | 1.55                                                         | 1.5x10 <sup>-8</sup> | 0.240                 | 0.21                                                                                   | -0.007 | 0.07 | 0.21                                                           | 0.001  | 0.90 | 0.25                                                                          | 0.027 | 5.6x10 <sup>-3</sup> |
| rs12448432 | 16  | 778820 | A  | 1.55                                                         | 1.2x10 <sup>-8</sup> | 0.288                 | 0.21                                                                                   | -0.007 | 0.06 | 0.21                                                           | 0.002  | 0.81 | 0.25                                                                          | 0.024 | 0.01                 |
| rs3829492  | 16  | 781633 | A  | 1.54                                                         | 6.9x10 <sup>-8</sup> | 0.060                 | 0.19                                                                                   | -0.010 | 0.01 | 0.18                                                           | 0.007  | 0.38 | 0.22                                                                          | 0.022 | 0.03                 |
| rs12443759 | 16  | 782132 | T  | 1.54                                                         | 6.9x10 <sup>-8</sup> | 0.060                 | 0.19                                                                                   | -0.010 | 0.01 | 0.18                                                           | 0.008  | 0.37 | 0.22                                                                          | 0.021 | 0.03                 |
| rs61112891 | 16  | 783156 | C  | 1.54                                                         | 1.1x10 <sup>-7</sup> | 0.042                 | 0.19                                                                                   | -0.010 | 0.02 | 0.19                                                           | 0.008  | 0.36 | 0.22                                                                          | 0.022 | 0.03                 |
| rs12051048 | 16  | 783864 | A  | 1.44                                                         | 2.1x10 <sup>-6</sup> | 0.004                 | 0.23                                                                                   | -0.007 | 0.07 | 0.23                                                           | 0.003  | 0.69 | 0.27                                                                          | 0.021 | 0.03                 |
| rs12051245 | 16  | 783865 | C  | 1.44                                                         | 2.1x10 <sup>-6</sup> | 0.004                 | 0.23                                                                                   | -0.007 | 0.07 | 0.23                                                           | 0.003  | 0.69 | 0.27                                                                          | 0.021 | 0.03                 |
| rs9928077  | 16  | 784765 | T  | 1.54                                                         | 2.6x10 <sup>-8</sup> | 0.151                 | 0.21                                                                                   | -0.007 | 0.09 | 0.21                                                           | 0.003  | 0.68 | 0.25                                                                          | 0.028 | 3.5x10 <sup>-3</sup> |
| rs12597563 | 16  | 787738 | C  | 1.57                                                         | 2.8x10 <sup>-8</sup> | 0.126                 | 0.19                                                                                   | -0.003 | 0.47 | 0.19                                                           | 0.005  | 0.58 | 0.21                                                                          | 0.030 | 3.1x10 <sup>-3</sup> |
| rs10794640 | 16  | 789618 | A  | 1.54                                                         | 3.1x10 <sup>-7</sup> | 0.015                 | 0.16                                                                                   | -0.006 | 0.16 | 0.16                                                           | 0.010  | 0.27 | 0.18                                                                          | 0.026 | 0.02                 |
| rs11648796 | 16  | 792190 | G  | 1.44                                                         | 2.4x10 <sup>-6</sup> | 0.003                 | 0.23                                                                                   | -0.005 | 0.17 | 0.23                                                           | 0.004  | 0.60 | 0.27                                                                          | 0.026 | 6.8x10 <sup>-3</sup> |

Abbreviations: Chr, chromosome; BP, base pair position (GRCh37); HR, hazard ratio; OR, odds ratio.

Supplemental Table 8: Characteristics of CCSS survivors without bone tumor pathologies who responded to the 2014 survey fracture history prompts versus those who did not (N=4,713)

| Characteristic                               | Provided detailed fracture history (N=2,955) | Fracture history non-responders <sup>a</sup> (N=1,758) | p <sup>b</sup> |
|----------------------------------------------|----------------------------------------------|--------------------------------------------------------|----------------|
|                                              | % (N) or mean (SD)                           | % (N) or mean (SD)                                     |                |
| Sex                                          |                                              |                                                        | <0.001         |
| Female                                       | 54.4% (1,607)                                | 46.8% (823)                                            |                |
| Male                                         | 45.6% (1,348)                                | 53.2% (935)                                            |                |
| Attained age (years) <sup>c</sup>            | 42.3 (7.2)                                   | 41.5 (7.4)                                             | <0.001         |
| Age at diagnosis (years)                     | 7.2 (5.9)                                    | 7.6 (5.7)                                              | 0.019          |
| Diagnosis                                    |                                              |                                                        | <0.001         |
| Leukemia                                     | 36.1% (1,068)                                | 33.6% (590)                                            |                |
| Hodgkin lymphoma                             | 13.7% (404)                                  | 16.2% (284)                                            |                |
| Central nervous system tumors                | 12.0% (355)                                  | 15.2% (267)                                            |                |
| Soft tissue sarcoma                          | 9.7% (286)                                   | 9.7% (171)                                             |                |
| Non-Hodgkin lymphoma                         | 8.7% (257)                                   | 9.4% (166)                                             |                |
| Kidney tumors                                | 11.3% (333)                                  | 8.5% (150)                                             |                |
| Neuroblastoma                                | 8.5% (252)                                   | 7.4% (130)                                             |                |
| Chemotherapy receipt (any) <sup>d</sup>      | 79.1% (2,220)                                | 76.7% (1,244)                                          | 0.078          |
| Radiation therapy receipt (any) <sup>e</sup> | 66.5% (1,877)                                | 72.3% (1,185)                                          | <0.001         |

- “Non-responders” include CCSS participants who either did not complete the 2014 follow-up survey (N=1,427) or did not provide complete fracture history information in the 2014 follow-up survey (N=331).
- Univariate t-test and chi-square tests were used to compare characteristics for responders and non-responders.
- For non-responders, attained age was evaluated among 1,372 surviving participants and defined as either the age at which the 2014 follow-up survey was mailed or completed.
- Chemotherapy data was available for 1,621 non-responders and 2,808 participants who provided detailed fracture histories.
- Radiation therapy data was available for 1,638 non-responders and 2,824 participants who provided detailed fracture histories.

## References

1. Howell RM, Smith SA, Weathers RE, Kry SF, Stovall M. Adaptations to a Generalized Radiation Dose Reconstruction Methodology for Use in Epidemiologic Studies: An Update from the MD Anderson Late Effect Group. *Radiat Res.* 2019;192(2):169-88.
2. Mostoufi-Moab S, Seidel K, Leisenring WM, Armstrong GT, Oeffinger KC, Stovall M, et al. Endocrine abnormalities in aging survivors of childhood cancer: a report from the Childhood Cancer Survivor Study. *J Clin Oncol.* 2016;34(27):3240.
3. Das S, Forer L, Schönherr S, Sidore C, Locke AE, Kwong A, et al. Next-generation genotype imputation service and methods. *Nat Genet.* 2016;48(10):1284-7.
4. McKenna A, Hanna M, Banks E, Sivachenko A, Cibulskis K, Kernysky A, et al. The Genome Analysis Toolkit: a MapReduce framework for analyzing next-generation DNA sequencing data. *Genome Res.* 2010;20(9):1297-303.
5. Li H, Handsaker B, Wysoker A, Fennell T, Ruan J, Homer N, et al. The sequence alignment/map format and SAMtools. *Bioinformatics.* 2009;25(16):2078-9.
6. Purcell S, Neale B, Todd-Brown K, Thomas L, Ferreira MA, Bender D, et al. PLINK: a tool set for whole-genome association and population-based linkage analyses. *Am J Hum Genet.* 2007;81(3):559-75.
7. Danecek P, Auton A, Abecasis G, Albers CA, Banks E, DePristo MA, et al. The variant call format and VCFtools. *Bioinformatics.* 2011;27(15):2156-8.
8. Sapkota Y, Turcotte LM, Ehrhardt MJ, Howell RM, Arnold MA, Wilson CL, et al. Genome-Wide Association Study in Irradiated Childhood Cancer Survivors Identifies HTR2A for Subsequent Basal Cell Carcinoma. *J Invest Dermatol.* 2019.
9. Sapkota Y, Cheung YT, Moon W, Shelton K, Wilson CL, Wang Z, et al. Whole-genome sequencing of childhood cancer survivors treated with cranial radiation therapy identifies 5p15. 33 locus for stroke: A report from the St. Jude Lifetime Cohort study. *Clin Cancer Res.* 2019:clincanres. 1231.2019.
10. Price AL, Patterson NJ, Plenge RM, Weinblatt ME, Shadick NA, Reich D. Principal components analysis corrects for stratification in genome-wide association studies. *Nat Genet.* 2006;38(8):904.
11. Wakefield J. A Bayesian measure of the probability of false discovery in genetic epidemiology studies. *Am J Hum Genet.* 2007;81(2):208-27.
12. Kemp JP, Morris JA, Medina-Gomez C, Forgetta V, Warrington NM, Youlten SE, et al. Identification of 153 new loci associated with heel bone mineral density and functional involvement of GPC6 in osteoporosis. *Nat Genet.* 2017;49(10):1468.
13. Morris JA, Kemp JP, Youlten SE, Laurent L, Logan JG, Chai RC, et al. An atlas of genetic influences on osteoporosis in humans and mice. *Nat Genet.* 2019;51(2):258-66.
14. Kircher M, Witten DM, Jain P, O'Roak BJ, Cooper GM, Shendure J. A general framework for estimating the relative pathogenicity of human genetic variants. *Nat Genet.* 2014;46(3):310.
15. McLaren W, Gil L, Hunt SE, Riat HS, Ritchie GR, Thormann A, et al. The ensembl variant effect predictor. *Genome Biol.* 2016;17(1):122.
16. GTEx Consortium. Human genomics. The Genotype-Tissue Expression (GTEx) pilot analysis: multitissue gene regulation in humans. *Science.* May 08 2015;348(6235):648-60. Epub 2015/05/09.
17. Leslie R, O'Donnell CJ, Johnson AD. GRASP: analysis of genotype-phenotype results from 1390 genome-wide association studies and corresponding open access database. *Bioinformatics.* 2014;30(12):i185-i94.
18. Bonder MJ, Luijk R, Zhernakova DV, Moed M, Deelen P, Vermaat M, et al. Disease variants alter transcription factor levels and methylation of their binding sites. *Nat Genet.* 2017;49(1):131.
19. Kundaje A, Meuleman W, Ernst J, Bilenky M, Yen A, Heravi-Moussavi A, et al. Integrative analysis of 111 reference human epigenomes. *Nature.* Feb 19 2015;518(7539):317-30. Epub 2015/02/20.
20. ENCODE Project Consortium. An integrated encyclopedia of DNA elements in the human genome. *Nature.* 2012;489(7414):57-74.
21. Gaulton KJ, Ferreira T, Lee Y, Raimondo A, Mägi R, Reschen ME, et al. Genetic fine mapping and genomic annotation defines causal mechanisms at type 2 diabetes susceptibility loci. *Nat Genet.* 2015;47(12):1415-25.
